# Supplementary material
Source: Springer Nature journal article supplement (https://www.springermedizin.de/resource/supplementary/12890_2011_335_MOESM1_ESM.pdf/9505038)
Supplement: MOESM1 [file 9505038]

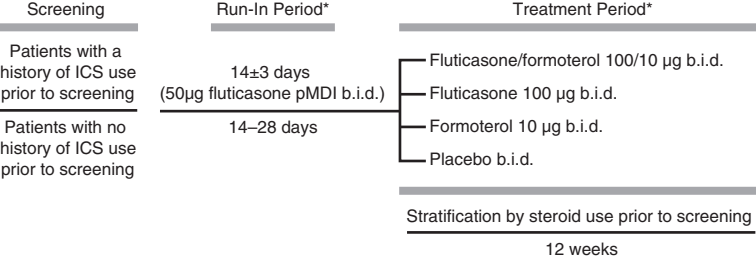

## Screening

Patients with a history of ICS use prior to screening

Patients with no history of ICS use prior to screening

## Run-In Period\*

14±3 days  
(50µg fluticasone pMDI b.i.d.)

14–28 days

## Treatment Period\*

Fluticasone/formoterol 100/10 µg b.i.d.

Fluticasone 100 µg b.i.d.

Formoterol 10 µg b.i.d.

Placebo b.i.d.

Stratification by steroid use prior to screening

12 weeks
